# Supplementary material for: Efficient plasmonic emission by the quantum Čerenkov effect from hot carriers in graphene
Source: Nat Commun. 2016 Jun 13;7:ncomms11880. doi: 10.1038/ncomms11880 (PMC4910017; doi:10.1038/ncomms11880)
Supplement: Supplementary Information — Supplementary Figure 1, Supplementary Notes 1-4 and Supplementary References [file ncomms11880-s1.pdf]

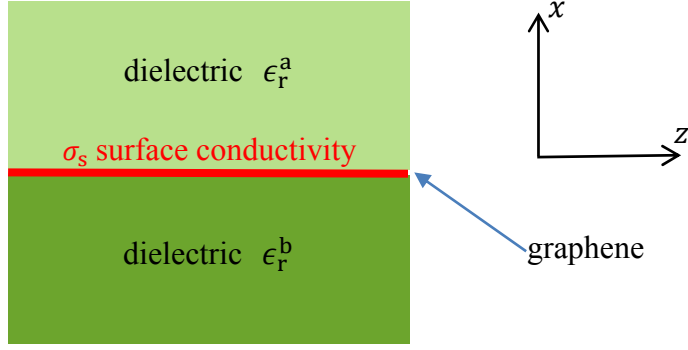

Supplementary Figure 1: Illustration of the graphene layer and its surrounding dielectrics.

## Supplementary Note 1

### Introducing graphene plasmons and their spinor-polarization coupling terms

We begin with the graphene Hamiltonian near the Dirac cone

$$H_{\text{graphene}} = \hbar v_F \boldsymbol{\sigma} \cdot \mathbf{k} \quad (1)$$

$$\boldsymbol{\sigma} = \left( \begin{pmatrix} 0 & 1 \\ 1 & 0 \end{pmatrix}, \begin{pmatrix} 0 & -i \\ i & 0 \end{pmatrix} \right) \quad (2)$$

using the same definitions as in the main text, with the Fermi velocity  $v_F \approx 10^6 \text{ m s}^{-1}$  and the charge carrier momentum  $\hbar \mathbf{k}$  satisfying a conical dispersion relation  $E^2 = |v_F \hbar \mathbf{k}|^2$ .

$\boldsymbol{\sigma}$  is a 2D vector of Pauli matrices. The eigenstates are [1]

$$\psi_{n,\mathbf{k}}(\mathbf{r}) = \frac{1}{\sqrt{S}} \begin{pmatrix} n \\ e^{i\varphi} \end{pmatrix} \frac{e^{i\mathbf{k} \cdot \mathbf{r}}}{\sqrt{2}} = \frac{1}{\sqrt{S}} \begin{pmatrix} n \\ e^{i\varphi} \end{pmatrix} \frac{e^{ik_z z + ik_y y}}{\sqrt{2}} \quad (3)$$

with the area  $S$  introduced for normalization purposes and the angle  $\varphi = \angle \mathbf{k} = \arctan(k_y/k_z)$ .

The sign  $n = 1$  ( $n = -1$ ) denotes the conduction (valence) band.

To add an electromagnetic interaction (describes either a photon or a plasmon) we substitute

$$\hbar \mathbf{k} \rightarrow \hbar \mathbf{k} + q_e \mathbf{A} \quad (4)$$

where we choose the gauge for which the scalar potential is zero. This way we can write  $\mathbf{A}$

directly from the in-plane electric field of the graphene plasmon  $\mathbf{A} = -i\mathbf{E}/\omega$

16 This approach of treating an “effective photon” (in our case a plasmon) by the electron-photon  
 17 QED interaction, derives from Ginzburg’s quantum description of the ČE [2], which has also  
 18 been developed by many authors for different dispersion relations [3]

19 Next, we present the electric and magnetic fields that compose the graphene plasmon. This  
 20 determines the polarization in the interaction Hamiltonian, and also gives the normalization of a  
 21 single plasmon quantum state. Most interactions of graphene with an electromagnetic excitation  
 22 consider free space photons, which has a negligible momentum in the plane of the graphene, so  
 23 the interaction is typically fully described by a time harmonic term with no space dependence. In  
 24 contrast, the graphene plasmon has large momentum that cannot be neglected. Moreover, the  
 25 graphene plasmon has longitudinal polarization in the graphene plane, making the interaction  
 26 term different from conventional light-matter interaction scenarios involving an electron and a  
 27 photon.

28 The fields that compose the plasmon are obtained by matching boundary conditions of the  
 29 electromagnetic fields that satisfy the Maxwell’s equations both above and below the graphene  
 30 (denoted by a and b sides respectively, as illustrated in the Supplementary Fig.1):

$$\mathbf{E}^{a,b} = \hat{x}E_{\perp}^{a,b} + (\hat{z}\cos(\theta) + \hat{y}\sin(\theta))E_{\parallel}^{a,b} \quad (5)$$

$$\mathbf{H}^{a,b} = (\hat{y}\cos(\theta) - \hat{z}\sin(\theta))H_{\parallel}^{a,b} \quad (6)$$

$$E_{\parallel}^{a,b} = [FNC]e^{-i\omega t + iq_y y + iq_z z} e^{-k^{a,b}x} \quad (7)$$

$$E_{\perp}^{a,b} = E_{\parallel}^{a,b} \frac{iq}{k^{a,b}} \quad H_{\parallel}^{a,b} = i\omega E_{\parallel}^{a,b} \frac{\epsilon_0 \epsilon_r^{a,b}}{k^{a,b}} \quad (8)$$

31  $\epsilon_0$  is the vacuum permittivity,  $\epsilon_r^{a,b}$  is the relative permittivity above (a) and below (b) the  
 32 graphene sheet.  $\perp$  denotes the polarization component that is perpendicular to the plane ( $\hat{x}$ ) and  $\parallel$   
 33 denotes the in-plane polarization component(s) ( $y, z$  plane).  $k^{a,b}$  is the decay rate perpendicular  
 34 to the graphene sheet coming from the (imaginary part of the) wavevector in the  $\hat{x}$  axis. The  
 35 wavevector constituents are:

$$q_y = q \sin(\theta) \quad q_z = q \cos(\theta) \quad (9)$$

$$\frac{q_x^{a,b}}{i} = k^{a,b} = \pm \sqrt{q^2 - \left(\frac{\omega}{c}\right)^2 \epsilon_r^{a,b}} \quad (10)$$

(for the geometry where a is above ( $x > 0$ ) and b is below ( $x < 0$ ) we have  $k^a$  real and positive while  $k^b$  real and negative). The field normalization coefficient [FNC] is an arbitrary complex coefficient according to the classical electromagnetic theory, but is given a fixed value below in the process of the field second quantization used for the quantum formalism of plasmon emission.

\* In contrast with the above, the other polarization mode leads to a different plasmonic dispersion that does not have the same properties, and in particular does not have high confinement (and high momentum), therefore its interaction is negligible compared to the above polarization choice.

To determine the expression in the interaction Hamiltonian, we only need the in-plane polarization component of the electric field on the graphene plane ( $x = 0$ ), giving:

$$\bar{\mathbf{A}}_{\parallel}^{x=0} = \hat{\mathbf{q}} \frac{[\text{FNC}]}{-i\omega} e^{-i\mathbf{q}\cdot\mathbf{r}+i\omega t} \quad (11)$$

Therefore the interaction Hamiltonian has the spinor-polarization term  $\boldsymbol{\sigma} \cdot \hat{\mathbf{q}}$ :

$$H_{\text{plasmon-interaction}} = q_e v_F \boldsymbol{\sigma} \cdot \bar{\mathbf{A}}_{\parallel}^{x=0} = q_e v_F \boldsymbol{\sigma} \cdot \hat{\mathbf{q}} \frac{[\text{FNC}]}{-i\omega} e^{-i\mathbf{q}\cdot\mathbf{r}+i\omega t} \quad (12)$$

We define the spinor-polarization term [SP] by the following:

$$\psi_{n_f, \mathbf{k}_f}^{\dagger} (\boldsymbol{\sigma} \cdot \hat{\mathbf{q}}) \psi_{n_i, \mathbf{k}_i} = [\text{SP}] e^{i(\mathbf{k}_i - \mathbf{k}_f) \cdot \mathbf{r}} / S \quad (13)$$

The indices i and f denote initial and final charge carrier in the process.

For a transition inside the same band  $n_f = n_i$  (intraband) we get:

$$\begin{aligned} [\text{SP}] &= \pm e^{i(\varphi_f - \varphi_i)/2} \left[ \frac{q_z}{q} \cos\left(\frac{1}{2}(\varphi_f + \varphi_i)\right) + \frac{q_y}{q} \sin\left(\frac{1}{2}(\varphi_f + \varphi_i)\right) \right] \\ &= \pm e^{i(\varphi_f - \varphi_i)/2} \cos(\theta - (\varphi_f + \varphi_i)/2) \end{aligned} \quad (14)$$

For a transition between the bands  $n_f = -n_i$  (interband) we get:

$$\begin{aligned} [\text{SP}] &= \pm i e^{i(\varphi_f - \varphi_i)/2} \left[ \frac{q_y}{q} \cos\left(\frac{1}{2}(\varphi_f + \varphi_i)\right) - \frac{q_z}{q} \sin\left(\frac{1}{2}(\varphi_f + \varphi_i)\right) \right] \\ &= \pm i e^{i(\varphi_f - \varphi_i)/2} \sin(\theta - (\varphi_f + \varphi_i)/2) \end{aligned} \quad (15)$$

Without loss of generality, we choose the incoming charge carrier along the z axis so that  $\mathbf{k}_i = \hat{z}E_i/(\hbar v_F)$ . The angles are then  $\angle \mathbf{k}_i = \varphi_i = 0$  and  $\angle \mathbf{k}_f = \varphi_f = \varphi$ . This gives the expressions we use in the main text:

$$|\text{SP}|^2 = \cos^2(\theta - \varphi/2) \quad |\text{SP}|^2 = \sin^2(\theta - \varphi/2) \quad (16)$$

## Supplementary Note 2

### The matrix elements and their normalization

The matrix elements describing the plasmon emission process (Fig.1 in the main text) is:

$$M_{\mathbf{k}_i \rightarrow \mathbf{k}_f + \mathbf{q}} = v_F q_e \iint_S dy dz \psi_{n_f, \mathbf{k}_f}^\dagger (\boldsymbol{\sigma} \cdot \bar{\mathbf{A}}_{\parallel}^{x=0}) \psi_{n_i, \mathbf{k}_i} \quad (17)$$

$$M_{\mathbf{k}_i \rightarrow \mathbf{k}_f + \mathbf{q}} = i \frac{q_e v_F}{\omega S} [\overline{\text{FNC}}][\text{SP}] \iint_S dy dz e^{i(\mathbf{k}_i - \mathbf{k}_f - \mathbf{q}) \cdot \mathbf{r}} e^{i\omega t} \quad (18)$$

Next we find the normalization used in the quantization of the graphene plasmon field  $[\overline{\text{FNC}}]$ , derived from the Poynting theorem for the energy carried by the field [3,4]. The energy stored in the electromagnetic field is:

$$U = \underbrace{\int_S dx dy}_{S} \int_{-\infty}^{\infty} dx |\mathbf{E}|^2 \frac{1}{2\omega} \frac{\partial}{\partial \omega} (\omega^2 \epsilon) \quad (19)$$

We assume no dispersion in the dielectrics on both sides of the graphene sheet. To calculate the energy we first have to consider the contribution of the graphene surface conductivity, because the energy stored in the 2D surface can be significant:

$$\epsilon = \epsilon_r \epsilon_0 + i \frac{\sigma}{\omega} = \epsilon_r \epsilon_0 + i \frac{\sigma_s}{\omega} \delta(x) = \epsilon_r \epsilon_0 - 2 \underbrace{\frac{\epsilon_0 \bar{\epsilon}_r v_p}{\omega}}_{\substack{\text{lossless surface} \\ \text{for the energy} \\ \text{normalization}}} \delta(x) \quad (20)$$

Substituting:

$$U = S \frac{1}{2\omega} \frac{\partial}{\partial \omega} (\omega^2 \epsilon_0 \epsilon_r^a) \int_0^{\infty} dx [|\mathbf{E}_{\parallel}^a|^2 + |\mathbf{E}_{\perp}^a|^2] + S \frac{1}{2\omega} \frac{\partial}{\partial \omega} (\omega^2 \epsilon_0 \epsilon_r^b) \int_{-\infty}^0 dx [|\mathbf{E}_{\parallel}^b|^2 + |\mathbf{E}_{\perp}^b|^2]$$

$$-S \frac{1}{2\omega} \frac{\partial}{\partial \omega} \left( 2\omega^2 \frac{\epsilon_0 \bar{\epsilon}_r v_p}{\omega} \right) \left[ |E_{\parallel}^0|^2 + \underbrace{|E_{\perp}^0|^2}_{=0} \right] \quad (21)$$

70 Where the parallel field component  $E_{\parallel}^0 = E_{\parallel}^a(x = 0^+) = E_{\parallel}^b(x = 0^-)$ , per the continuity relation,  
 71 while the perpendicular field component is not continuous and averages to zero on the surface.  
 72 Next, we apply an approximation that is typically used with graphene plasmons (the same  
 73 approximation used in the main text):  $k^a \approx k^b \approx q$ . This is a good approximation because of the  
 74 large confinement factor, or in other words,  $q \gg \omega/c$  (free space wavelength  $\gg$  graphene  
 75 plasmon wavelength). It allows us to write:

$$U = 2\epsilon_0 |\text{FNC}|^2 S \frac{1}{2\omega} \frac{\partial}{\partial \omega} (2\omega^2 \bar{\epsilon}_r) \int_0^{\infty} dx e^{-2qx} - |\text{FNC}|^2 S \frac{1}{2\omega} \frac{\partial}{\partial \omega} \left( \omega^2 \frac{2\epsilon_0 \bar{\epsilon}_r v_p}{\omega} \right) \quad (22)$$

$$U = 2\epsilon_0 \bar{\epsilon}_r |\text{FNC}|^2 S 2 \frac{1}{2q} - \epsilon_0 \bar{\epsilon}_r |\text{FNC}|^2 S \frac{1}{\omega} \frac{\partial}{\partial \omega} (v_p \omega) \quad (23)$$

$$U = \epsilon_0 \bar{\epsilon}_r |\text{FNC}|^2 S \left[ \frac{2}{q} - \frac{1}{\omega} \frac{\partial}{\partial \omega} (v_p \omega) \right] = \epsilon_0 \bar{\epsilon}_r |\text{FNC}|^2 S \frac{v_p}{q} \frac{\partial q}{\partial \omega} \quad (24)$$

76 The last step uses the following:

$$\frac{1}{\omega} \frac{\partial}{\partial \omega} (v_p \omega) = \frac{1}{\omega} \frac{\partial}{\partial \omega} \left( \frac{\omega^2}{q} \right) = \frac{2}{q} - \frac{\omega}{q^2} \frac{\partial q}{\partial \omega} = \frac{2}{q} - \frac{v_p}{q} \frac{\partial q}{\partial \omega} \quad (25)$$

77 At last, comparing the energy to  $\hbar\omega$ , we get the normalization coefficient  $|\text{FNC}|^2$ :

$$\epsilon_0 \bar{\epsilon}_r |\text{FNC}|^2 S \frac{v_p}{q} \frac{\partial q}{\partial \omega} = \hbar\omega \quad (26)$$

78 With the definition  $\tilde{\omega} = \bar{\epsilon}_r \omega \cdot \frac{v_p}{v_g} = \bar{\epsilon}_r \omega \cdot v_p \frac{\partial q}{\partial \omega}$  (as we had in the main text), we can write:

$$|\text{FNC}|^2 = \omega^2 \frac{\hbar q}{\tilde{\omega} \epsilon_0 S} \quad (27)$$

79 Substituting [FNC] back to the matrix element we get:

$$M_{\mathbf{k}_i \rightarrow \mathbf{k}_f + \mathbf{q}} = i \frac{q_e v_F}{S} \sqrt{\frac{\hbar q}{\tilde{\omega} \epsilon_0 S}} [\text{SP}] \iint_S dy dz e^{i(\mathbf{k}_i - \mathbf{k}_f - \mathbf{q}) \cdot \mathbf{r}} e^{i\omega t} \quad (28)$$

80

81

## 82 **Supplementary Note 3**

### 83 **Solving for the graphene Čerenkov effect with plasmonic losses**

84 In this section we consider complex plasmonic momenta (taking losses into account) in the  
 85 matrix elements, which we substitute into a Fermi golden rule calculation to find the rate of  
 86 plasmon emission of the graphene ČE.

87 The  $y, z$  integrals in the matrix element give sinc functions that will become delta functions or  
 88 Lorentzians when we take the normalization area  $S$  to infinity. To find the exact coefficient, we  
 89 write  $S$  as  $L_y L_z$  so:

$$\begin{aligned} \iint_S dy dz e^{i(\mathbf{k}_i - \mathbf{k}_f - \mathbf{q}) \cdot \mathbf{r}} &= \int_{-L_y/2}^{L_y/2} dy \int_{-L_z/2}^{L_z/2} dz e^{i(\mathbf{k}_i - \mathbf{k}_f - \mathbf{q}) \cdot \mathbf{r}} \\ &= L_y L_z \text{sinc}\left(\frac{L_y}{2}(q_y + k_{fy})\right) \text{sinc}\left(\frac{L_z}{2}(k_{iz} - q_z - k_{fz})\right) \end{aligned} \quad (29)$$

90 The matrix element is modulo-squared hence we use the following delta function limit:

$$L_z \left| \text{sinc}\left(\frac{L_z}{2}(k_{iz} - q_z - k_{fz})\right) \right|^2 \xrightarrow{L_z \rightarrow \infty} 2\pi \delta(k_{iz} - q_z - k_{fz}) \quad (30)$$

91 We consider losses as an imaginary part added to the plasmon wavevector [5], denoting  $q_z =$   
 92  $q_{Rz} + iq_{Iz}$  and  $q_y = q_{Ry} + iq_{Iy}$ . In this case the limit of infinite area can be shown to give a  
 93 Lorentzian.

$$\delta(k_{iz} - q_z - k_{fz}) \rightarrow \frac{|q_{Iz}|/\pi}{(k_{iz} - q_{Rz} - k_{fz})^2 + |q_{Iz}|^2} \quad (31)$$

94

95 Recalling the Fermi's golden rule (Eq.1 from the main text)

$$\Gamma = \underbrace{2}_{\text{summing over spin}} \frac{2\pi}{\hbar} \cdot \int_{-\infty}^{\infty} |M_{\mathbf{k}_i \rightarrow \mathbf{k}_f + \mathbf{q}}|^2 \delta(E_i - \hbar\omega(\mathbf{q}) - E_f(\mathbf{k}_f)) \frac{d^2 \mathbf{q}}{(2\pi)^2/S} \frac{d^2 \mathbf{k}_f}{(2\pi)^2/S} \quad (32)$$

96 We substitute the Lorentzians and get the following

$$\begin{aligned} \Gamma &= \int_{-\infty}^{\infty} \frac{\alpha c \hbar v_g(\mathbf{q})}{\bar{\epsilon}_r v_p^2(\mathbf{q})/v_F^2} \delta(E_i - \hbar\omega \pm E_{\mathbf{k}_f}) |\text{SP}|^2 \\ &\cdot \frac{|q_{Iy}|/\pi}{(q_{Ry} + k_{fy})^2 + |q_{Iy}|^2} \frac{|q_{Iz}|/\pi}{(k_{iz} - q_{Rz} - k_{fz})^2 + |q_{Iz}|^2} dq_{Rz} dq_{Ry} dk_{fz} dk_{fy} \end{aligned} \quad (33)$$

97  $v_g$  ( $v_p$ ) is the group (phase) velocity of the graphene plasmom.

98 The integrals over the plasmon momentum are changed to

$$dq_{Rz}dq_{Ry} = \frac{q}{v_g} d\theta d\omega = \frac{\omega/v_p}{v_g} d\theta d\omega \quad (34)$$

99 The integrals over the momentum of the outgoing charge carrier are used to solve the delta  
100 function over energy

$$\delta(E_i - \hbar\omega \pm E_{\mathbf{k}_f}) dk_{fz} dk_{fy} = \frac{|E_i - \hbar\omega|}{(\hbar v_f)^2} d\varphi, \quad (35)$$

101 which restricts the energy of the outgoing charge carrier to  $E_{\mathbf{k}_f} = |E_i - \hbar\omega|$ . The absolute value  
102 is necessary because the charge carrier energies (incoming and outgoing) are defined relative to  
103 the tip of the Dirac cone. Therefore while intraband transitions will have  $E_i > \hbar\omega$ , interband  
104 transitions can have  $E_i < \hbar\omega$ . In both cases we can substitute:

$$k_{fz} = \frac{|E_i - \hbar\omega|}{\hbar v_F} \cos(\varphi) \quad k_{fy} = \frac{|E_i - \hbar\omega|}{\hbar v_F} \sin(\varphi) \quad (36)$$

106 Eventually obtaining Eq.6 from the main text (defining  $\gamma(\omega) = q_R(\omega)/q_I(\omega)$ ):

$$\begin{aligned} \Gamma_{\omega,\theta} = & \frac{\alpha c}{\pi^2 \bar{\epsilon}_r v_p(\omega)} \left| \frac{E_i}{\hbar\omega} - 1 \right| \int_0^{2\pi} d\varphi \begin{cases} \cos^2(\theta - \varphi/2) & \text{intraband transition} \\ \sin^2(\theta - \varphi/2) & \text{interband transition} \end{cases} \\ & \cdot \frac{\left| \frac{\sin(\theta)}{\gamma(\omega)} \right|}{\left( \frac{v_p(\omega)}{v_F} \left| \frac{E_i}{\hbar\omega} - 1 \right| \sin(\varphi) + \sin(\theta) \right)^2 + \left| \frac{\sin(\theta)}{\gamma(\omega)} \right|^2} \\ & \cdot \frac{|\cos(\theta) / \gamma(\omega)|}{\left( \frac{v_p(\omega)}{v_F} \left| \frac{E_i}{\hbar\omega} - 1 \right| \cos(\varphi) + \cos(\theta) - \frac{v_p(\omega)}{v_F} \frac{E_i}{\hbar\omega} \right)^2 + |\cos(\theta) / \gamma(\omega)|^2} \end{aligned} \quad (37)$$

107

## 108 **Supplementary Note 4**

### 109 **The graphene Čerenkov effect in its lossless limit and compared to the conventional theory**

110 We consider the limit case of low losses, since then further analytical simplifications can be  
111 achieved. By taking the delta function limit of the Lorentzians Eq.1 translates into

$$\Gamma = \int d^2\mathbf{q} \frac{\alpha \hbar v_g(\mathbf{q})}{\bar{\epsilon}_r v_p^2(\mathbf{q})/v_F^2} \delta(E_i - \hbar\omega(\mathbf{q}) \pm E_{\mathbf{k}_f}) |\text{SP}|^2 \quad (38)$$

$$\Gamma_\omega = \int_0^{2\pi} d\theta \frac{\alpha c \hbar \omega / v_p(\omega)}{\bar{\epsilon}_r v_p^2(\omega) / v_F^2} \delta(E_i - \hbar \omega \pm E_{\mathbf{k}_f}(\theta, \omega)) |\text{SP}|^2 \quad (39)$$

112 Changing the integration variable  $\theta$  to  $E_{\mathbf{k}_f}$  gives the following Jacobian

$$2 \left| \frac{1 - \frac{\hbar \omega}{E_i}}{\hbar \omega \frac{v_F}{v_p} \sin(\theta_{\check{c}})} \right|, \quad (40)$$

113 which we substitute back to get:

$$\Gamma_\omega = \frac{2\alpha c v_F}{\bar{\epsilon}_r v_p^2(\omega)} \left| \frac{1 - \frac{\hbar \omega}{E_i}}{\sin(\theta_{\check{c}})} \right| |\text{SP}|^2 \quad (41)$$

114 The delta function forces the conservation of energy  $E_{\mathbf{k}_f}(\theta, \omega) = |E_i - \hbar \omega|$ , which gives the  
 115 modified Čerenkov angle:

$$E_i - \hbar \omega = \pm v_F \hbar |\mathbf{k}_f| \quad (42)$$

$$(E_i - \hbar \omega)^2 = (\hbar v_F)^2 [|\mathbf{k}_i|^2 + |\mathbf{q}|^2 - 2\mathbf{k}_i \cdot \mathbf{q}] \quad (43)$$

$$(E_i - \hbar \omega)^2 = E_i^2 + (\hbar \omega v_F / v_p)^2 - 2E_i \hbar \omega v_F / v_p \cos(\theta_{\check{c}}) \quad (44)$$

$$2E_i \hbar \omega \frac{v_F}{v_p} \cos(\theta_{\check{c}}) = (\hbar \omega)^2 \left( \left( \frac{v_F}{v_p} \right)^2 - 1 \right) + 2E_i \hbar \omega \quad (45)$$

$$\frac{v_F}{v_p} \cos(\theta_{\check{c}}) = 1 + \frac{\hbar \omega}{2E_i} \left( \left( \frac{v_F}{v_p} \right)^2 - 1 \right) \quad (46)$$

116 Therefore the equation for the Čerenkov angle in the quantum 2D ČE (Eq.4 from the main text):

$$\cos(\theta_{\check{c}}) = \frac{v_p}{v_f} \left[ 1 - \frac{\hbar \omega}{2E_i} \left( 1 - \frac{v_F^2}{v_p^2} \right) \right] \quad (47)$$

117 Notice that when taking  $\hbar \rightarrow 0$  (or  $E_i \gg \hbar \omega$ ), we get the well-known equation  $\cos(\theta_{\check{c}}) = v_p / v_F$   
 118 for the conventional Čerenkov angle [3].

119

120 To find the total rate of plasmon emission we need to explicitly find the spinor-polarization term  
 121  $|\text{SP}|^2$  by substituting the angles of the plasmon ( $\theta_{\check{c}}$ ) and of the outgoing charge carrier ( $\varphi$ ). The  
 122 latter can be found from the delta functions on the momenta in the  $y$  axis  $\delta(q_y + k_{fy})$ :

$$\sin(\varphi) = - \frac{\sin(\theta)}{\left| \frac{E_i}{\hbar \omega} - 1 \right|} \frac{v_F}{v_p}, \quad (48)$$

123 or from the delta function on the momenta in the  $z$  axis  $\delta(k_{iz} - q_z - k_{fz})$ :

$$\cos(\varphi) = \frac{1}{\left|\frac{\hbar\omega}{E_i} - 1\right|} - \frac{\cos(\theta)}{\left|\frac{E_i}{\hbar\omega} - 1\right|} \frac{v_F}{v_p} \quad (49)$$

124 We write  $|\text{SP}|^2$  in the following way capturing both interband and intraband transitions:

$$|\text{SP}|^2 = \frac{1 \pm \cos(2\theta_c - \varphi)}{2}, \quad (50)$$

125 which we can translate to the following form:

$$|\text{SP}|^2 = \frac{v_p^2}{v_F^2} \frac{\left|1 - \frac{\hbar\omega}{2E_i} \left(1 + \frac{v_F}{v_p} \cos(\theta_c)\right)\right|}{\left|1 - \frac{\hbar\omega}{E_i}\right|} \quad (51)$$

126 or further simplify to get the following:

$$|\text{SP}|^2 = \frac{v_p^2}{v_F^2} \frac{1}{\left|1 - \frac{\hbar\omega}{E_i}\right|} \frac{\sin^2(\theta_c)}{1 - v_p^2/v_F^2} \quad (52)$$

127 Giving the equation for the rate of plasmon emission per unit frequency from a single hot carrier  
128 in graphene (Eq.5)

$$\Gamma_\omega = \frac{2\alpha c}{v_F \bar{\epsilon}_r} \frac{\left|1 - \frac{\hbar\omega}{2E_i} \left(1 + \frac{v_F}{v_p} \cos(\theta_c)\right)\right|}{|\sin(\theta_c)|} = \frac{2\alpha c}{v_F \bar{\epsilon}_r} \left| \frac{\sin(\theta_c)}{1 - v_p^2/v_F^2} \right| \quad (53)$$

129 Notice that in the limit of  $\hbar \rightarrow 0$  (or  $E_i \gg \hbar\omega$ ) we get the following

$$\Gamma_\omega = \frac{2\alpha c}{v_F \bar{\epsilon}_r} \frac{1}{|\sin(\theta_c)|} = \frac{2\alpha c}{v \bar{\epsilon}_r} \frac{1}{\sqrt{1 - v_p^2/v^2}}, \quad (54)$$

130 which is the classical limit of the Čerenkov Effect for a free charge particle (relativistic or not)  
131 moving outside graphene and parallel to it with velocity  $v$  (here there are no quantum corrections  
132 hence the regular Čerenkov threshold  $v > v_p$  is required for the emission of plasmons). The  
133 same expression can be derived from the Maxwell equations.

134

### 135 **Supplementary references**

136 [1] Neto, A. C., Guinea, F., Peres, N. M. R., Novoselov, K. S., & Geim, A. K. The electronic  
137 properties of graphene. *Reviews of Modern Physics*, **81**, 109 (2009).

- 138 [2] Ginzburg, V. L., Quantum Theory of Radiation of Electron Uniformly Moving in Medium,  
139 *Zh. Eksp. Teor. Fiz.* **10**, 589-600 (1940); *J. Phys. USSR* **2**, 441-452 (1940).
- 140 [3] Harris, E. G., *A pedestrian approach to quantum field theory* (John Willey and Sons, Inc.,  
141 New York, London, 1972).
- 142 [4] Landau, L. D. and Lifshitz, E. M. *Electrodynamics of Continuous Media* (Addison-Wesley,  
143 Reading, Mass., 1960)
- 144 [5] Jablan, M., Buljan, H., and Soljacic, M., Plasmonics in graphene at infrared frequencies, *Phys.*  
145 *Rev. B* **80**, 245435 (2009).
